# Supplementary material for: Virus persistence in pig herds led to successive reassortment events between swine and human influenza A viruses, resulting in the emergence of a novel triple-reassortant swine influenza virus
Source: Springer Nature journal article supplement (doi:10.1186/s13567-019-0699-y), 2019-10-07

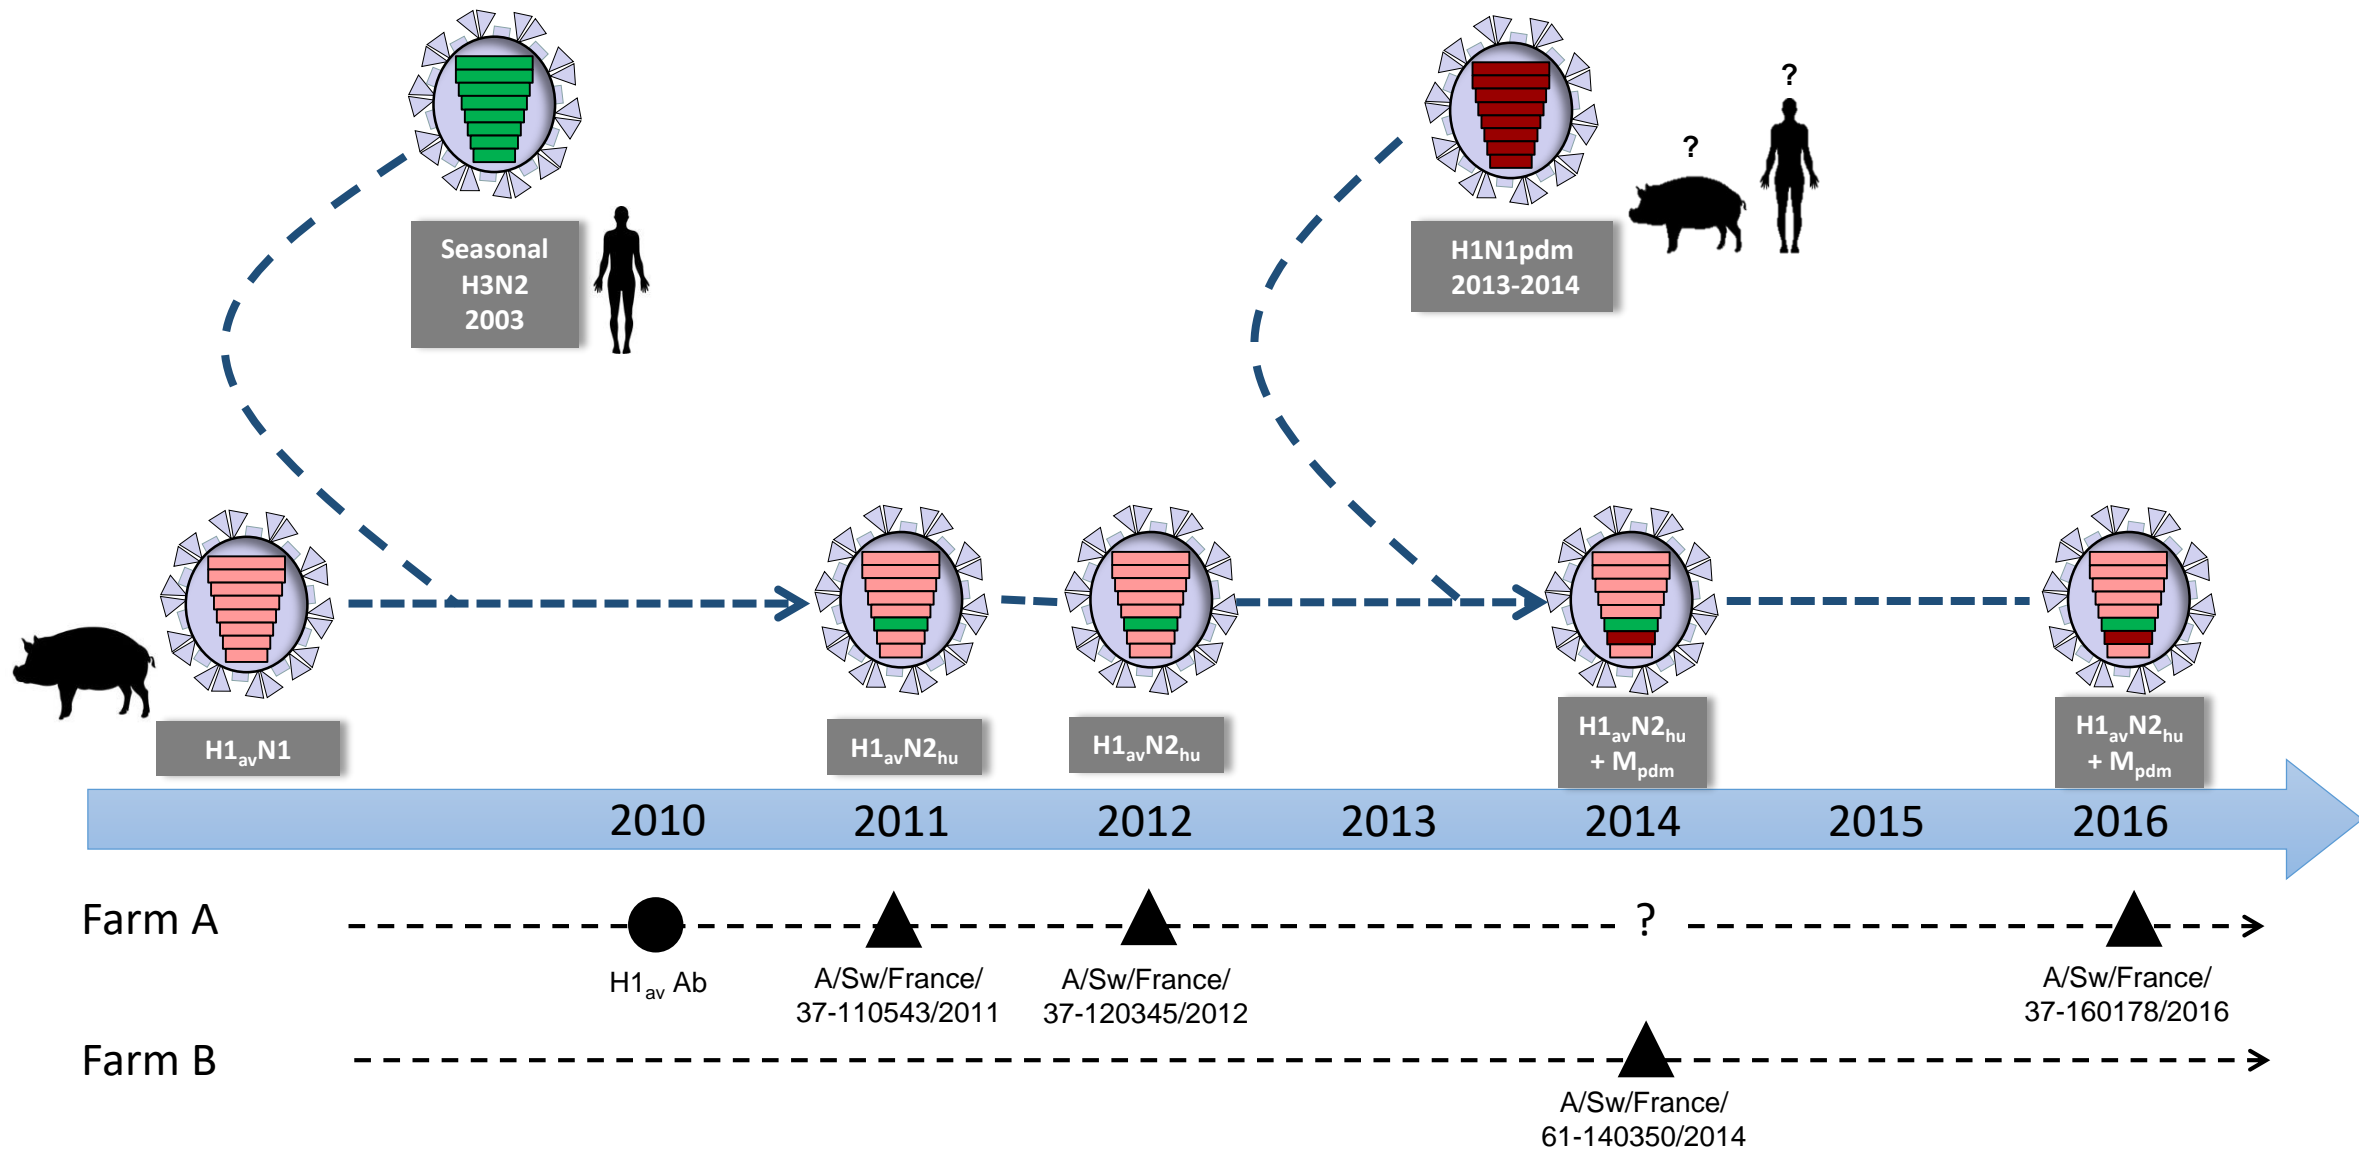

Supplement: MOESM1 [file 13567_2019_699_MOESM1_ESM.pdf]
